# Supplementary material for: Fully end-to-end deep-learning-based diagnosis of pancreatic tumors
Source: PubMed Central journal article supplement (PMC7778580; doi:10.7150/thno.52508), 2021-01-01
Supplement: thnov11p1982s1.pdf [file thnov11p1982s1.pdf]

**Table S1.** Detailed architecture of ResNet18.

| ResNet18 |             |               |               |                |                  |                  |          |
|----------|-------------|---------------|---------------|----------------|------------------|------------------|----------|
| Layer    | Kernel Size | Kernel Number | Kernel Stride | DS_Kernel Size | DS_Kernel Number | DS_Kernel Stride | FC Units |
| Conv     | 7*7         | 64            | 2             | -              | -                | -                | -        |
| MaxPool  | 3*3         | -             | 2             | -              | -                | -                | -        |
| ID       | 3*3         | 64            | 1             | -              | -                | -                | -        |
| Block*2  |             |               |               |                |                  |                  |          |
| DS Block | 3*3         | 128           | 1             | 3*3            | 128              | 2                | -        |
| ID Block | 3*3         | 128           | 1             | -              | -                | -                | -        |
| DS Block | 3*3         | 256           | 1             | 3*3            | 256              | 2                | -        |
| ID Block | 3*3         | 256           | 1             | -              | -                | -                | -        |
| DS Block | 3*3         | 512           | 1             | 3*3            | 512              | 2                | -        |
| ID Block | 3*3         | 512           | 1             | -              | -                | -                | -        |
| AvgPool  | 7*7         | -             | 1             | -              | -                | -                | -        |
| FC       | -           | -             | -             | -              | -                | -                | 512      |

**Table S2.** Detailed architecture of U-Net32.

| U-Net32    |             |               |               |
|------------|-------------|---------------|---------------|
| Layer      | Kernel Size | Kernel Number | Kernel Stride |
| Conv Block | 3*3         | 16            | 1             |
| MaxPool    | 2*2         | -             | 2             |
| Conv Block | 3*3         | 32            | 1             |
| MaxPool    | 2*2         | -             | 2             |
| Conv Block | 3*3         | 64            | 1             |
| MaxPool    | 2*2         | -             | 2             |
| Conv Block | 3*3         | 128           | 1             |
| MaxPool    | 2*2         | -             | 2             |
| Conv Block | 3*3         | 256           | 1             |
| Trans Conv | 2*2         | 128           | 2             |
| Conv Block | 3*3         | 128           | 1             |
| Trans Conv | 2*2         | 64            | 2             |
| Conv Block | 3*3         | 64            | 1             |
| Trans Conv | 2*2         | 32            | 2             |
| Conv Block | 3*3         | 32            | 1             |
| Trans Conv | 2*2         | 16            | 2             |
| Conv Block | 3*3         | 16            | 1             |
| Conv       | 1*1         | 2             | 1             |

**Table S3.** Detailed architecture of ResNet34.

| ResNet34 |             |               |               |                |                  |                  |          |
|----------|-------------|---------------|---------------|----------------|------------------|------------------|----------|
| Layer    | Kernel Size | Kernel Number | Kernel Stride | DS_Kernel Size | DS_Kernel Number | DS_Kernel Stride | FC Units |
| Conv     | 7*7         | 64            | 2             | -              | -                | -                | -        |
| MaxPool  | 3*3         | -             | 2             | -              | -                | -                | -        |
| ID       | 3*3         | 64            | 1             | -              | -                | -                | -        |
| Block*3  |             |               |               |                |                  |                  |          |
| DS Block | 3*3         | 128           | 1             | 3*3            | 128              | 2                | -        |
| ID       | 3*3         | 128           | 1             | -              | -                | -                | -        |
| Block*3  |             |               |               |                |                  |                  |          |
| DS Block | 3*3         | 256           | 1             | 3*3            | 256              | 2                | -        |
| ID       | 3*3         | 256           | 1             | -              | -                | -                | -        |
| Block*5  |             |               |               |                |                  |                  |          |
| DS Block | 3*3         | 512           | 1             | 3*3            | 512              | 2                | -        |
| ID       | 3*3         | 512           | 1             | -              | -                | -                | -        |
| Block*2  |             |               |               |                |                  |                  |          |
| AvgPool  | 7*7         | -             | 1             | -              | -                | -                | -        |
| FC       | -           | -             | -             | -              | -                | -                | 512      |

AvgPool, average-pooling; BN, batch normalization; Conv, convolution; DS, down sampling; FC, fully connected; ID, identity; MaxPool, max-pooling; ReLU, rectified linear unit; Trans, transposed.
